# Supplementary figures and images for: Semi-syntheses of the 11-hydroxyrotenoids sumatrol and villosinol
Source: Royal Society of Chemistry journal article supplement (doi:10.1039/c8ob01919c), 2018-01-01

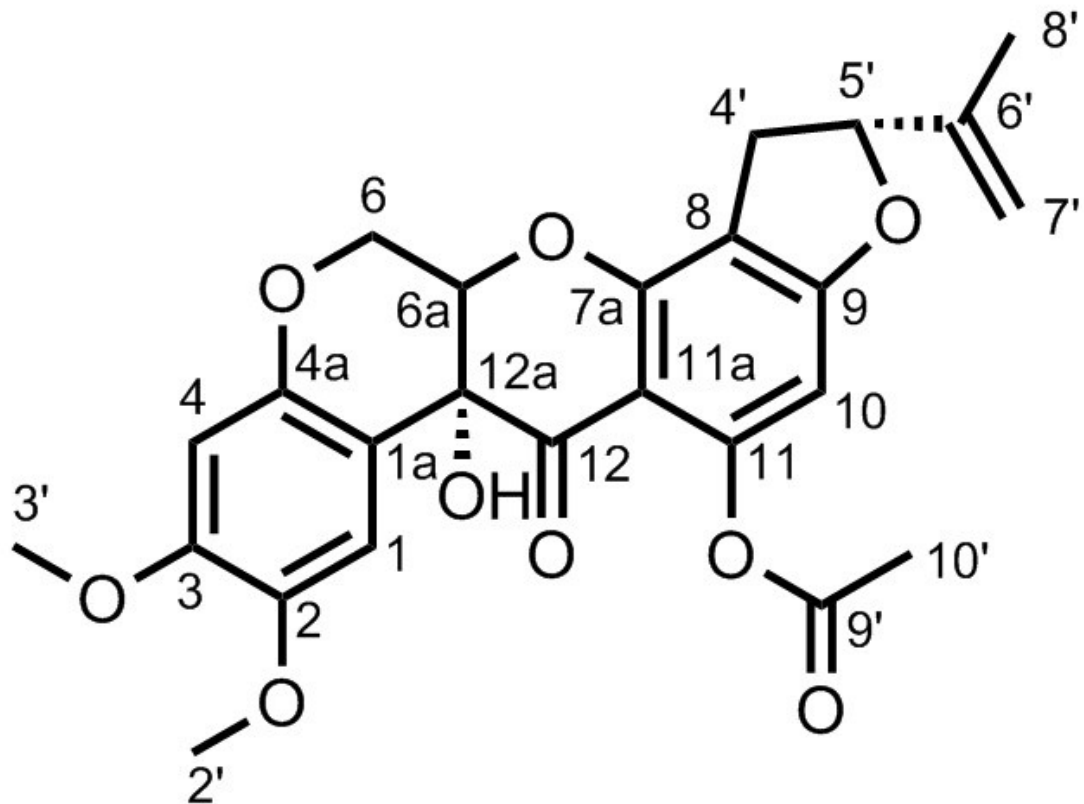

Supplement: c8ob01919c1.pdf [file c8ob01919c1.pdf]

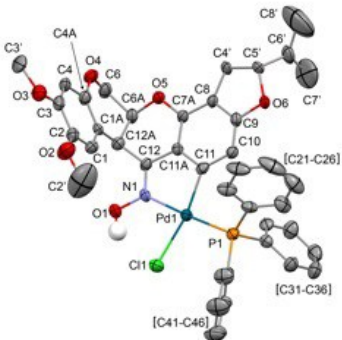

Supplement: c8ob01919c2.pdf [file c8ob01919c2.pdf]
